# Supplementary material for: Information Sharing in Competing Supply Chains with Carbon Emissions Reduction Incentives
Source: MDPI journal article supplement (doi:10.3390/su142013086), 2022-10-12
Supplement: s1 [file s1]

## Supplementary Materials: Proofs of the Propositions

### Lemma 1:

**Proof.** It is easy to show that the coefficients of  $Y$  in  $e^S$  and  $\omega^S$  are positive when  $m > \frac{1}{4}\gamma^2$ . Moreover, as we assume  $m > \frac{1}{3}\gamma^2$ , so the coefficients of  $e^S$  and  $\omega^S$  are always positive for the rest of our paper.

### Proposition 1:

**Proof.** Let the retailer's profit under the information sharing case be less than that without information sharing, i.e.,  $\pi_R^S > \pi_R^N$ ; it is easy to derive that the condition  $m < \frac{1}{2}\gamma^2$  must be satisfied. Similarly, we can derive the conditions where information sharing benefits the manufacturer and supply chain by comparing the manufacturer's and supply chain's profits under the two cases, respectively.

### Proposition 2:

**Proof.** It is easy to prove proposition 2 by comparing the optimal investment level of the manufacturer under the two cases.

### Proposition 3:

**Proof.** As the demand becomes more variable, that is, a larger  $\sigma$ , we can obtain the following results by taking derivations of the retailer's, manufacturer's and supply chain's profits under the information sharing or non-information sharing cases with respect to  $\sigma^2$ , respectively, as follows:  $\frac{d\pi_R^S}{d\sigma^2} > 0$ ;  $\frac{d\pi_R^N}{d\sigma^2} > 0$ ;  $\frac{d\pi_M^S}{d\sigma^2} > 0$ ;  $\frac{d\pi_M^N}{d\sigma^2} = 0$ ;  $\frac{d\pi^S}{d\sigma^2} > 0$ ;  $\frac{d\pi^N}{d\sigma^2} > 0$ .

### Proposition 4:

**Proof.** (a) When  $m < \frac{1}{2}\gamma^2$ , we have  $\pi_R^S > \pi_R^N$  and  $\pi_M^S > \pi_M^N$ . Hence, the retailer will share the private information voluntarily without any payment, and  $X^* = S$  is the equilibrium decision.

(b) When  $\frac{1}{2}\gamma^2 < m < \frac{(3+\sqrt{5})}{4}\gamma^2$ , we have  $\pi_R^S < \pi_R^N$ , and  $\pi_M^S - (\pi_R^N - \pi_R^S) \geq \pi_M^N$ , so the manufacturer will offer  $T = \pi_R^N - \pi_R^S$  to obtain the retailer's private information, and  $X^* = S$  is the equilibrium decision.

(c) When  $m > \frac{(3+\sqrt{5})}{4}\gamma^2$ , we have  $\pi_R^S < \pi_R^N$ ,  $\pi_M^S - (\pi_R^N - \pi_R^S) < \pi_M^N$ . The manufacturer will not pay for the information, and  $X^* = N$  is the equilibrium decision.

**Lemma 2:**

**Proof.** For Cournot competition, when the information sharing arrangement is  $(X_1, X_2)$ , we can prove that  $q_i^{X_i X_j} = q_i^{X_i}(q_j^{X_j X_i})$  by substituting the equations of  $q_j^{X_j X_i}$  into  $q_i^{X_i}$ , where  $q_i^{X_i}(q_j)$  is given by (26) and (30),  $X = S$  or  $N$  and  $i \neq j$ , respectively. Similarly, we can verify that  $\omega_i^{X_i X_j} = \omega_i^{X_i}(q_j^{X_j X_i})$  and  $e_i^{X_i X_j} = e_i^{X_i}(q_j^{X_j X_i})$ , where  $\omega_i^{X_i}(q_j)$  is given by (24) and (28), and the  $e_i^{X_i}(q_j)$  is given by (25) and (29). Thus  $(q_i^{X_i X_j}, \omega_i^{X_i X_j}, e_i^{X_i X_j})$  is an equilibrium. The proof of the uniqueness of the equilibrium is similar to that of Ha et al. (2011) and is omitted.

**Lemma 3:**

**Proof.** For part (a), we can verify  $C_i^{X_i X_j} < 1$ . So,  $\alpha_i^{SX_j} > 0$  and  $\beta_i^{SX_j} > 0$  if and only if  $m > \frac{1}{4}\gamma^2$ . Moreover, as we assume that  $m > \frac{1}{3}\gamma^2$  to ensure interior equilibrium solutions; in this case, we can say  $e_i^{X_i X_j}$  and  $\omega_i^{X_i X_j}$  are increasing in  $Y_i$ .

For part (b), we can derive the following:

$$C_i^{SS} - C_i^{NS} = \frac{t\sigma^2(1+t\sigma^2)^2(4m-\gamma^2)(\gamma^2-2m)}{[(4+4t\sigma^2+\lambda t\sigma^2)m-(1+t\sigma^2)\gamma^2][8(1+t\sigma^2)^2-\lambda^2 t^2 \sigma^4]m-2\gamma^2(1+t\sigma^2)^2]} > 0 \quad \text{when } m < \frac{1}{2}\gamma^2$$

$$C_i^{SN} - C_i^{NN} = \frac{2t\sigma^2(1+t\sigma^2)^2(\gamma^2-2m)}{[(4+4t\sigma^2+\lambda t\sigma^2)m-(1+t\sigma^2)\gamma^2][2(1+t\sigma^2)+\lambda t\sigma^2]} > 0 \quad \text{when } m < \frac{1}{2}\gamma^2$$

$$C_j^{SS} - C_j^{SN} = \frac{mt^2\sigma^4\lambda(1+t\sigma^2)(2m-\gamma^2)}{[(4+4t\sigma^2+\lambda t\sigma^2)m-(1+t\sigma^2)\gamma^2][8(1+t\sigma^2)^2-\lambda^2 t^2 \sigma^4]m-2\gamma^2(1+t\sigma^2)^2]} > 0 \quad \text{when } m \geq \frac{1}{2}\gamma^2$$

$$C_j^{NS} - C_j^{NN} = \frac{t^2\sigma^4\lambda(1+t\sigma^2)(2m-\gamma^2)}{[8(1+t\sigma^2)^2-\lambda^2 t^2 \sigma^4]m-2\gamma^2(1+t\sigma^2)^2][2(1+t\sigma^2)+\lambda t\sigma^2]} > 0 \quad \text{when } m \geq \frac{1}{2}\gamma^2$$

As a result, information sharing in supply chain  $i$  makes  $q_i$  less responsive to  $Y_i$  and makes  $q_j$  more responsive to  $Y_j$  when  $m \geq \frac{1}{2}\gamma^2$ .

**Proposition 5:**

**Proof.** For part (a), we have the following:

$$\pi_{R_j}^S(C_i^{SS}) - \pi_{R_j}^S(C_i^{NS}) = \frac{m^2 t \sigma^4 \lambda (C_i^{NS} - C_i^{SS})(2 - \lambda C_i^{SS} - \lambda C_i^{NS})}{(4m - \gamma^2)^2 (1 + t\sigma^2)} \geq 0 \quad \text{when } m \geq \frac{1}{2}\gamma^2$$

$$\pi_{M_j}^S(C_i^{SS}) - \pi_{M_j}^S(C_i^{NS}) = \frac{mt\sigma^4\lambda(C_i^{NS}-C_i^{SS})(2-\lambda C_i^{SS}-\lambda C_i^{NS})}{2(4m-\gamma^2)(1+t\sigma^2)} \geq 0 \text{ when } m \geq \frac{1}{2}\gamma^2$$

For part (b), we have the following:

$$\pi_{R_j}^N(C_i^{SN}) - \pi_{R_j}^N(C_i^{NN}) = \frac{t\sigma^4\lambda(C_i^{NN}-C_i^{SN})(2-\lambda C_i^{SN}-\lambda C_i^{NN})}{4(1+t\sigma^2)} \geq 0 \text{ when } m \geq \frac{1}{2}\gamma^2$$

$$\pi_{M_j}^N(C_i^{SN}) - \pi_{M_j}^N(C_i^{NN}) = 0$$

**Proposition 6:**

$$\textbf{Proof. } \pi_i^S(C_j^{X_jN}) - \pi_i^N(C_j^{X_jN}) = \frac{t\sigma^4(1-\lambda C_j^{X_jN})^2(6m\gamma^2-4m^2-\gamma^4)}{4(4m-\gamma^2)^2(1+t\sigma^2)} > 0 \text{ when } m < \frac{(3+\sqrt{5})}{4}\gamma^2$$

$$\pi_i^S(C_j^{X_jS}) - \pi_i^S(C_j^{X_jN}) = \frac{m(6m-\gamma^2)t\sigma^4\lambda(C_j^{X_jN}-C_j^{X_jS})(2-\lambda C_j^{X_jS}-\lambda C_j^{X_jN})}{2(4m-\gamma^2)^2(1+t\sigma^2)} > 0 \text{ when } m < \frac{1}{2}\gamma^2$$

**Proposition 7:**

**Proof.** For part (a), we can show that  $\beta_i^{SX_j} - \beta_i^{NX_j} > 0$  and  $\beta_i^{SX_j^2} - \beta_i^{NX_j^2} > 0$  regardless of  $X_j = S$  or  $N$ ; For part (b), we can show that  $\Delta E[I_i^S] - \Delta E[I_i^N] > 0$  when  $m < \frac{1}{2}\gamma^2$ .

**Proposition 8:**

**Proof.** Information sharing benefits supply chain  $i$  when  $V_i^S > 0$ , which is equivalent to  $g > 0$ , where

$$g = m^3 \frac{t^4\sigma^8\lambda^4}{(1+t\sigma^2)^4} - 8m^3 \frac{t^2\sigma^4\lambda^2}{(1+t\sigma^2)^2} - 2(4m-\gamma^2)(-6m\gamma^2+4m^2+\gamma^4)$$

Let  $x = \frac{t^2\sigma^4\lambda^2}{(1+t\sigma^2)^2}$ ; we have  $0 < x < 1$ ; rewrite  $g$  as  $g(x) = m^3x^2 - 8m^3x - 2(4m - \gamma^2)(-6m\gamma^2 + 4m^2 + \gamma^4)$ , and  $g(x)$  has two roots, as follows:

$$x_1(m) = \frac{1}{m^3} (4m^3 + \gamma^2\sqrt{2m^3(6m-\gamma^2)} - 2m\sqrt{2m^3(6m-\gamma^2)})$$

$$x_2(m) = \frac{1}{m^3} (4m^3 - \gamma^2\sqrt{2m^3(6m-\gamma^2)} + 2m\sqrt{2m^3(6m-\gamma^2)})$$

We can prove that when  $m > \frac{1}{3}\gamma^2$ ,  $x_2(m) > 1$ , and  $x_1(m)$  is decreasing with  $m$ .

Therefore, we do not need to consider  $x_2(m)$  when  $0 < x < 1$ . Given  $t$  and  $\lambda$ , we have the unique  $m^S$  such that  $x_1(m^S) = \frac{t^2\sigma^4\lambda^2}{(1+t\sigma^2)^2}$ . We can prove that  $g > 0$  if and only if  $m < m^S$ .

Since  $x_1(m) > 1$  when  $m < \frac{1}{2}\gamma^2$  and  $x_1(m) > 0$  when  $m > \frac{(3+\sqrt{5})}{4}\gamma^2$ , we can obtain that

$\frac{1}{2}\gamma^2 < m^S < \frac{(3+\sqrt{5})}{4}\gamma^2$ . Note that  $x_1(m^S)$  is increasing in  $t$ ,  $\lambda$  and  $\gamma$  (i.e.,  $\frac{dx_1(m^S)}{dt} =$

$$\frac{2t\sigma^4\lambda^2}{(1+t\sigma^2)^3} > 0, \quad \frac{dx_1(m^S)}{d\lambda} = \frac{2t^2\sigma^4\lambda}{(1+t\sigma^2)^2} > 0, \quad \frac{dx_1(m^S)}{d\gamma} = \frac{1}{(m^S)^3} \left[ 2\gamma\sqrt{2(m^S)^3(6m^S - \gamma^2)} + (2m - \gamma^2) \frac{2\gamma(m^S)^3}{\sqrt{2(m^S)^3(6m^S - \gamma^2)}} \right] = \frac{2\gamma(14m^S - \gamma^2)}{\sqrt{2(m^S)^3(6m^S - \gamma^2)}} > 0), \quad x_1(m) \text{ is decreasing with } m, \text{ so } m^S \text{ is}$$

decreasing in  $t, \lambda$ , and increasing in  $\gamma$ .

We can also prove that  $V_i^N > 0$  if and only if  $h > 0$ , where

$$h = m(4m - \gamma^2) \frac{t^4\sigma^8\lambda^4}{(1+t\sigma^2)^4} - 16m^2 \frac{t^2\sigma^4\lambda^2}{(1+t\sigma^2)^2} - 8(-6m\gamma^2 + 4m^2 + \gamma^4)$$

Let  $x = \frac{t^2\sigma^4\lambda^2}{(1+t\sigma^2)^2}$ , and we have  $0 < x < 1$ ; rewrite  $h$  as  $h(x) = m(4m - \gamma^2)x^2 - 16m^2x - 8(-6m\gamma^2 + 4m^2 + \gamma^4)$ , and  $h(x)$  has two roots as follows:

$$x_3(m) = \frac{1}{m(4m - \gamma^2)} (8m^2 + 2\gamma^2\sqrt{2m(6m - \gamma^2)} - 4m\sqrt{2m(6m - \gamma^2)})$$

$$x_4(m) = \frac{1}{m(4m - \gamma^2)} (8m^2 - 2\gamma^2\sqrt{2m(6m - \gamma^2)} + 4m\sqrt{2m(6m - \gamma^2)})$$

We can prove that when  $m > \frac{1}{3}\gamma^2$ ,  $x_4(m) > 1$  and  $x_3(m)$  is decreasing with  $m$ .

Therefore, we do not need to consider  $x_4(m)$  when  $0 < x < 1$ . Given  $t$  and  $\lambda$ , we have the unique  $m^N$  such that  $x_3(m^N) = \frac{t^2\sigma^4\lambda^2}{(1+t\sigma^2)^2}$ . We can prove that  $h > 0$  if and only if  $m < m^N$ .

Since  $x_3(m) > 1$  when  $m < \frac{1}{2}\gamma^2$  and  $x_3(m) > 0$  when  $m > \frac{(3+\sqrt{5})}{4}\gamma^2$ . We can obtain that  $\frac{1}{2}\gamma^2 < m^N < \frac{(3+\sqrt{5})}{4}\gamma^2$ . Note that  $x_3(m)$  is increasing in  $t, \lambda$  and  $\gamma$  (i.e.,

$$\frac{dx_3(m^N)}{dt} = \frac{2t\sigma^4\lambda^2}{(1+t\sigma^2)^3} > 0, \quad \frac{dx_3(m^N)}{d\lambda} = \frac{2t^2\sigma^4\lambda}{(1+t\sigma^2)^2} > 0, \quad \frac{dx_3(m^N)}{d\gamma} = \frac{8m^N\gamma\sqrt{2m^N(6m^N - \gamma^2)}}{m^N(4m^N - \gamma^2)^2} + \frac{(4m^N - 2\gamma^2)2m^N\gamma}{m^N(4m^N - \gamma^2)\sqrt{2m^N(6m^N - \gamma^2)}} = \frac{4\gamma[32(m^N)^2 - 10m^N\gamma^2 + \gamma^4]}{(4m^N - \gamma^2)^2\sqrt{2m^N(6m^N - \gamma^2)}} > 0), \quad x_3(m) \text{ is decreasing with } m.$$

Therefore,  $m^N$  is decreasing in  $t, \lambda$ , and increasing in  $\gamma$ . In addition,  $m^N < m^S$  because

$$x_1(m) > x_3(m) \text{ if } \frac{1}{2}\gamma^2 < m < \frac{(3+\sqrt{5})}{4}\gamma^2.$$

### Proposition 9:

**Proof.** For part (a), we divide the expression  $\pi_{R_i}^{SX_j} - \pi_{R_i}^{NX_j}$  into two parts, i.e.,  $\pi_{R_i}^S(C_j^{X_jN}) - \pi_{R_i}^N(C_j^{X_jN})$  and  $\pi_{R_i}^S(C_j^{X_jS}) - \pi_{R_i}^S(C_j^{X_jN})$ , that is  $\pi_{R_i}^{SX_j} - \pi_{R_i}^{NX_j} = \pi_{R_i}^S(C_j^{X_jN}) - \pi_{R_i}^N(C_j^{X_jN}) + \pi_{R_i}^S(C_j^{X_jS}) - \pi_{R_i}^S(C_j^{X_jN})$ . We find that  $\pi_{R_i}^S(C_j^{X_jN}) - \pi_{R_i}^N(C_j^{X_jN}) =$

$$\frac{t\sigma^4(1-\lambda C_j^{XjN})^2(8m\gamma^2-8m^2-\gamma^4)}{4(4m-\gamma^2)^2(1+t\sigma^2)} \geq 0 \quad \text{when } m \leq \frac{(2+\sqrt{2})}{4}\gamma^2, \text{ and } \pi_{Ri}^S(C_j^{XjS}) - \pi_{Ri}^S(C_j^{XjN}) =$$

$$\frac{m^2t\sigma^4\lambda(C_j^{XjN}-C_j^{XjS})(2-\lambda C_j^{XjS}-\lambda C_j^{XjN})}{(4m-\gamma^2)^2(1+t\sigma^2)} \geq 0 \quad \text{when } m \leq \frac{1}{2}\gamma^2.$$
 Therefore, we can prove that  $\pi_{Ri}^{NXj} \leq \pi_{Ri}^{SXj}$  ( $i = 1, 2$ ) when  $m \leq \frac{1}{2}\gamma^2$ , so retailer  $i$  will share the information with manufacturer  $i$  without any payment, and the  $(S, S)$  is the unique equilibrium; For part (b), when  $\frac{1}{2}\gamma^2 < m < m^N$ , we can obtain both that  $V_i^S > 0$  and  $V_i^N > 0$  for  $i = 1, 2$ , so  $S$  is the dominant strategy for both manufacturers and  $(S, S)$  is the unique equilibrium; For part (c), when  $m^N < m < m^S$ , we can obtain that  $V_i^N < 0$  and  $V_i^S > 0$  for  $i = 1, 2$ , so  $(N, N)$  and  $(S, S)$  are possible equilibria. However, we can show that  $\pi_{Mi}^{NS} + V_i^S > \pi_{Mi}^{NN}$  for  $i = 1, 2$ . Hence,  $(S, S)$  is optimal; For part (d), when  $m > m^S$ , we can show that  $V_i^S < 0$  and  $V_i^N < 0$ . Therefore,  $(N, N)$  is the unique equilibrium.
